# Supplementary material for: Hospital-Acquired Pressure Ulcers and Long-Term Motor Score Recovery in Patients With Acute Cervical Spinal Cord Injury
Source: PubMed Central journal article supplement (PMC11624580; doi:10.1001/jamanetworkopen.2024.44983), 2024-12-06
Supplement: jamanetwopen-e2444983-s002.pdf [file jamanetwopen-e2444983-s002.pdf]

## Data Sharing Statement

Kopp. Hospital-Acquired Pressure Ulcers and Long-Term Motor Score Recovery in Patients With Acute Cervical Spinal Cord Injury. *JAMA Netw Open*. Published December 06, 2024. doi:10.1001/jamanetworkopen.2024.44983

### Data

**Data available:** Yes

**Data types:** Deidentified participant data, Data dictionary

**How to access data:** [https://www.nscisc.uab.edu/Research/NSCISC\\_DatabasePublicUse](https://www.nscisc.uab.edu/Research/NSCISC_DatabasePublicUse)

**When available:** With publication

### Supporting Documents

**Document types:** Statistical/analytic code

**How to access documents:** [marcel.kopp@charite.de](mailto:marcel.kopp@charite.de)

**When available:** With publication

### Additional Information

**Who can access the data:** Researchers whose proposed use of the data has been approved

**Types of analyses:** For non-commercial research

**Mechanisms of data availability:** With investigator support via online data request form
